# Supplementary material
Source: Springer Nature journal article supplement (https://www.springermedizin.de/resource/supplementary/12969_2009_386_MOESM2_ESM.pdf/9592926)

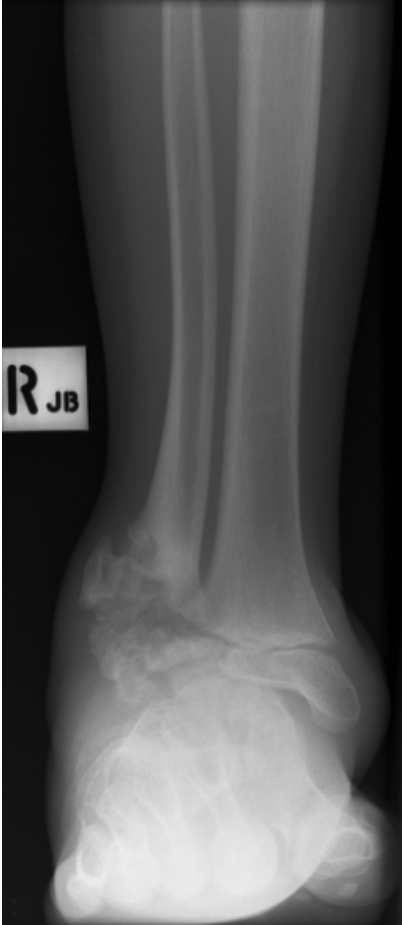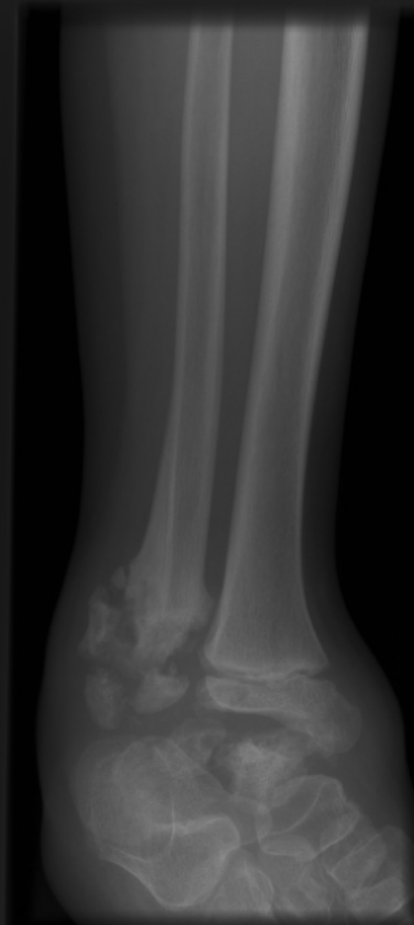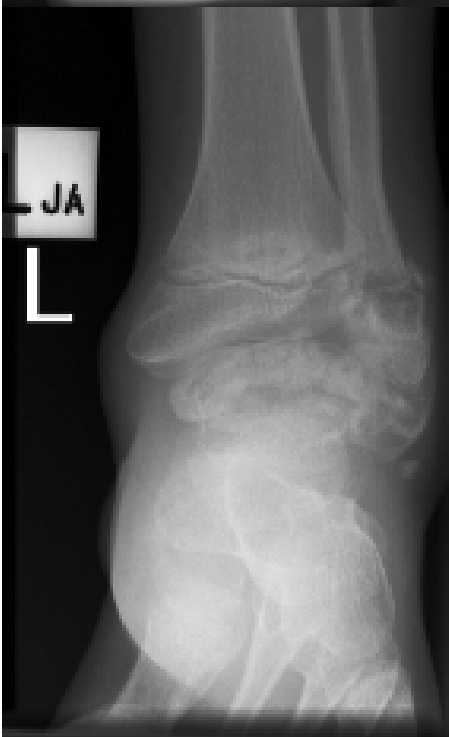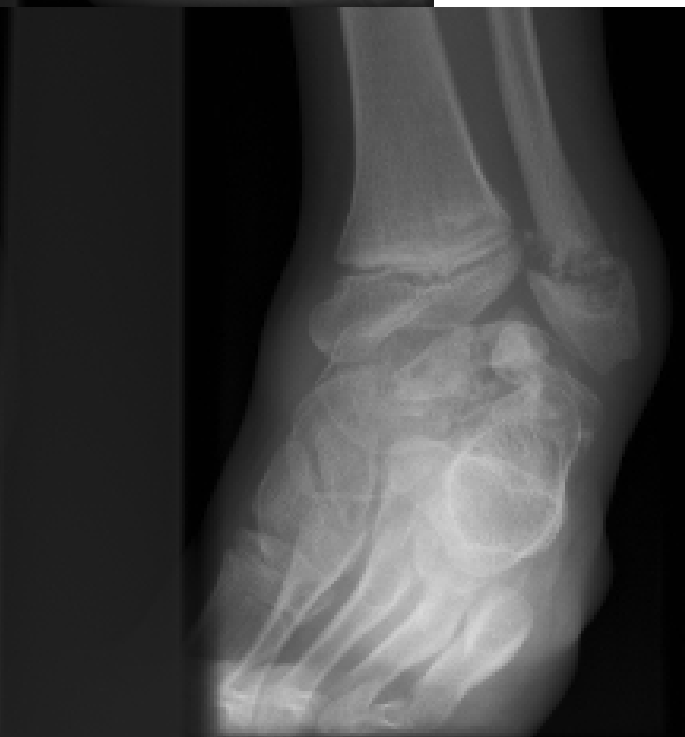

Supplement: MOESM2 [file 9592926]
